# Supplementary material
Source: PubMed Central journal article supplement (PMC2528100)
Supplement: pp.108.123505_2.pdf [file pp.108.123505_2.pdf]

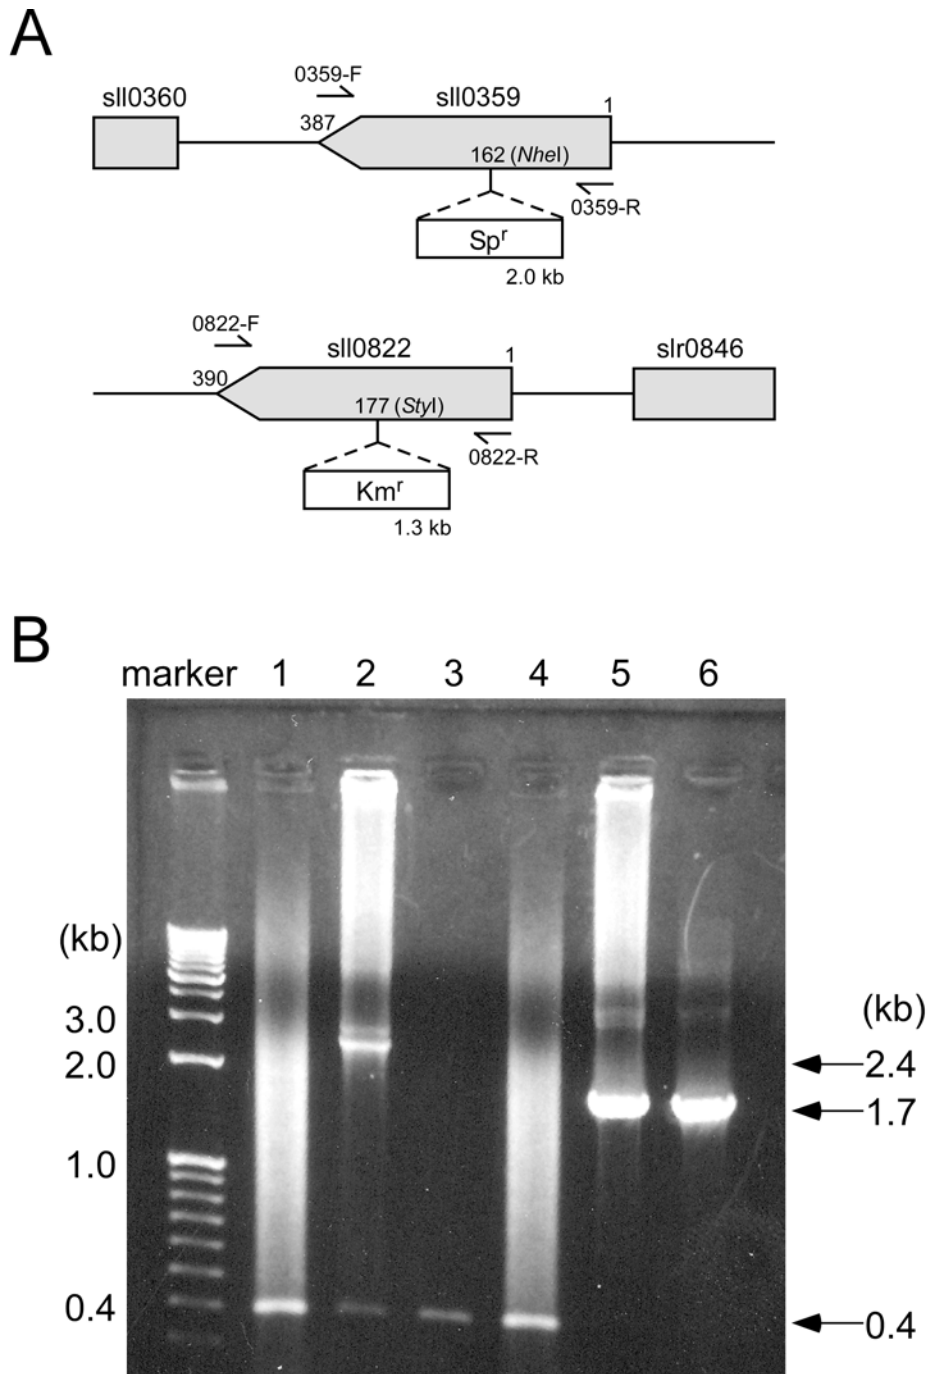

Fig. S2. Insertional inactivation of *sll0359* and *sll0822* genes. (A) Scheme of the constructs for disruption of *sll0359* and *sll0822*. The spectinomycin resistance cartridge ( $Sp^r$ ) and the kanamycin resistance cartridge ( $Km^r$ ) were inserted into the *NheI* site of *sll0359* and the *StyI* site of *sll0822*, respectively. Arrows indicate the positions of the primers used for PCR amplification. (B) PCR amplification of *sll0359* (lanes 1-3) and *sll0822* genes (lanes 4-6) using genomic DNA from WT (lanes 1 and 4), plasmids for insertional inactivation (lanes 2 and 5), and genomic DNA from mutants (lanes 3 and 6) as templates.
