# Supplementary material
Source: PubMed Central journal article supplement (PMC2528100)
Supplement: pp.108.123505_3.pdf [file pp.108.123505_3.pdf]

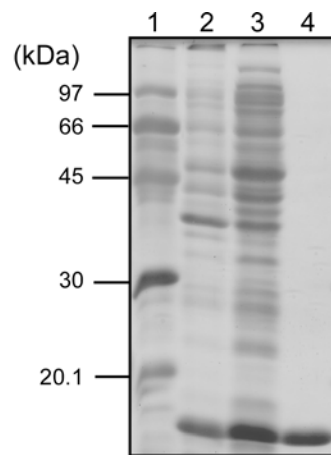

Fig. S3. Overexpression and purification of His-Sll0822 from *E. coli* cells. Molecular mass standards (lane 1), soluble fraction of *E. coli* extract (lane 2), insoluble fraction of *E. coli* extract (lane 3), and His-Sll0822-containing fraction eluted from the nickel-chelating column by 300 mM imidazole (lane 4) were separated by 15% (w/v) SDS-polyacrylamide gel electrophoresis followed by staining with Coomassie Brilliant Blue R-250.
